# Supplementary material
Source: publisher figshare collection journal article supplement (https://acs.figshare.com/ndownloader/files/3810679)
Supplement: Supplementary file 1 [file 3810679]

## SUPPORTING INFORMATION

### **Trichoharzianol, a New Antifungal from *Trichoderma* *harzianum* F031**

Chotika Jeerapong,<sup>†</sup> Worrapong Phupong,<sup>†,\*</sup> Phuwadol Bangrak,<sup>†</sup> Warin Intana,<sup>‡</sup> and  
Patoomratana Tuchinda<sup>§</sup>

<sup>†</sup>School of Science, Walailak University, Tha Sala, Nakhon Si Thammarat, 80161, Thailand

<sup>‡</sup>School of Agricultural Technology, Walailak University, Tha Sala, Nakhon Si Thammarat,  
80161, Thailand

<sup>§</sup>Department of Chemistry and Center of Excellence for Innovation in Chemistry (PERCH-CIC),  
Faculty of Science, Mahidol University, Rama VI Road, Bangkok 10400, Thailand

#### **Corresponding Author**

\*Phone: +66-7567-2989, +66-7567-2090. Fax: +66-7567-2004.

E-mail: worrapong@gmail.com.

|                                                 | Page |
|-------------------------------------------------|------|
| <sup>1</sup> H NMR spectrum of trichoharzianol  | 2    |
| <sup>13</sup> C NMR spectrum of trichoharzianol | 3    |

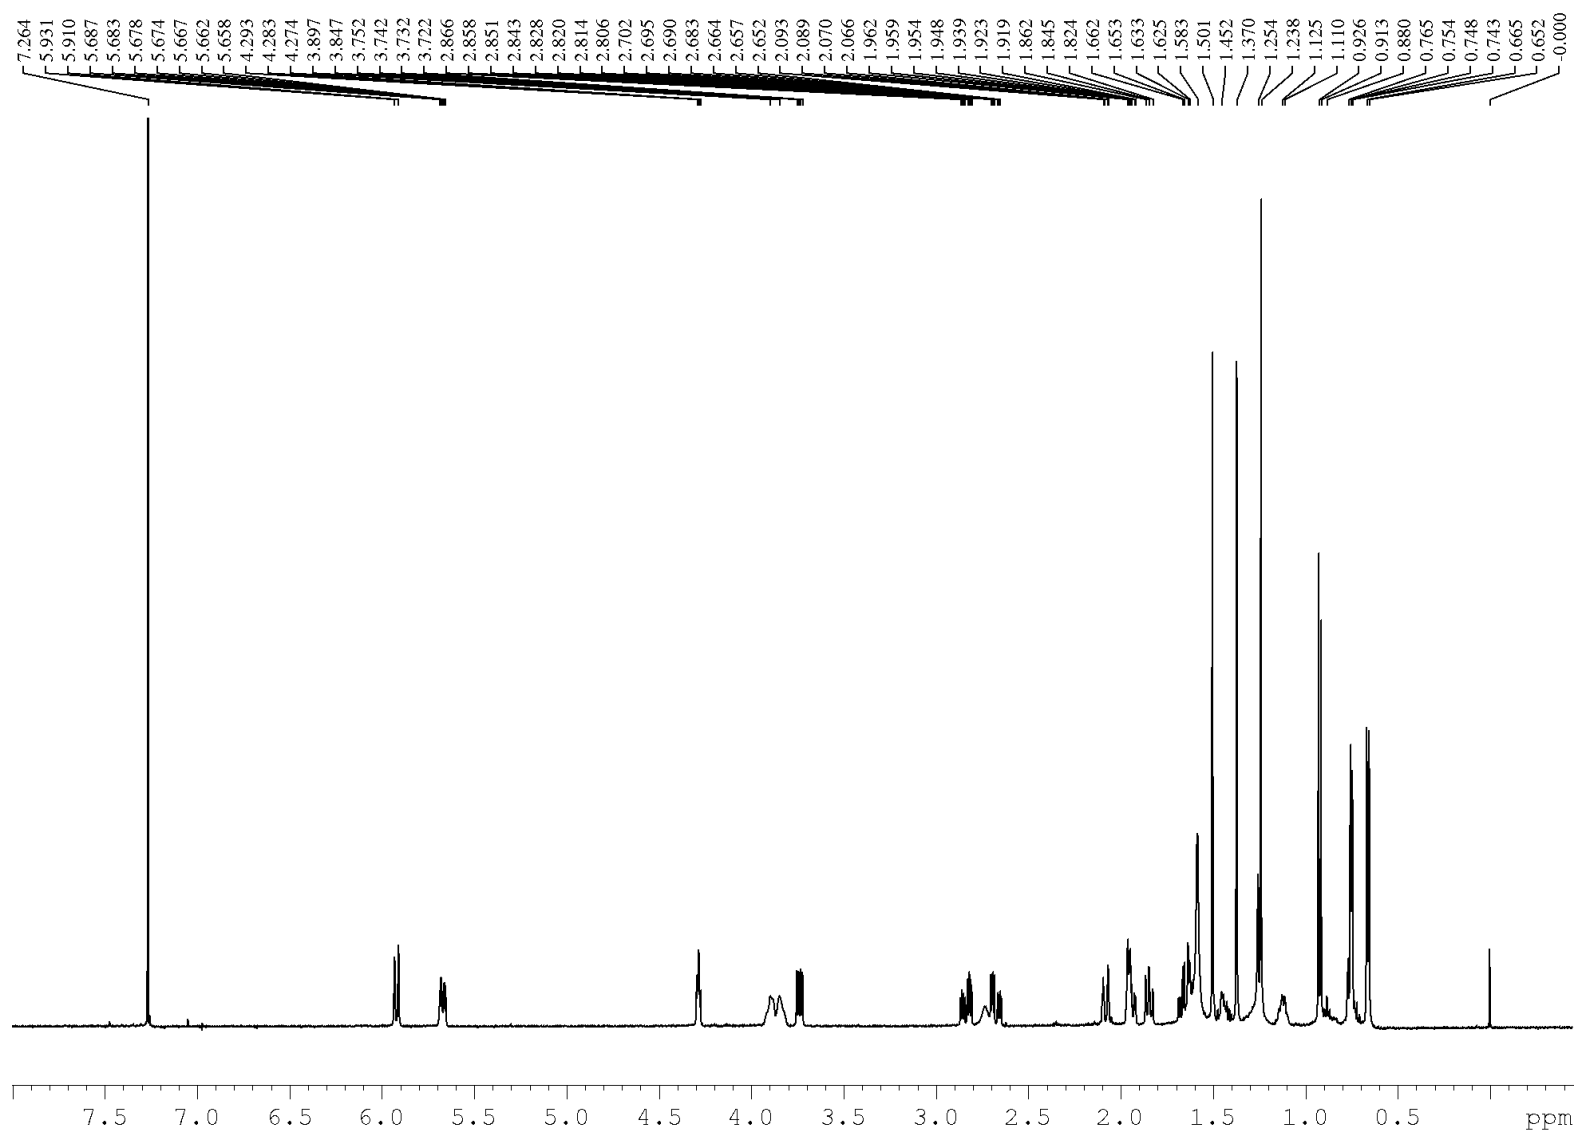

**Figure 1.**  $^1\text{H}$  NMR (500 MHz) of trichoharzianol in  $\text{CDCl}_3$ .

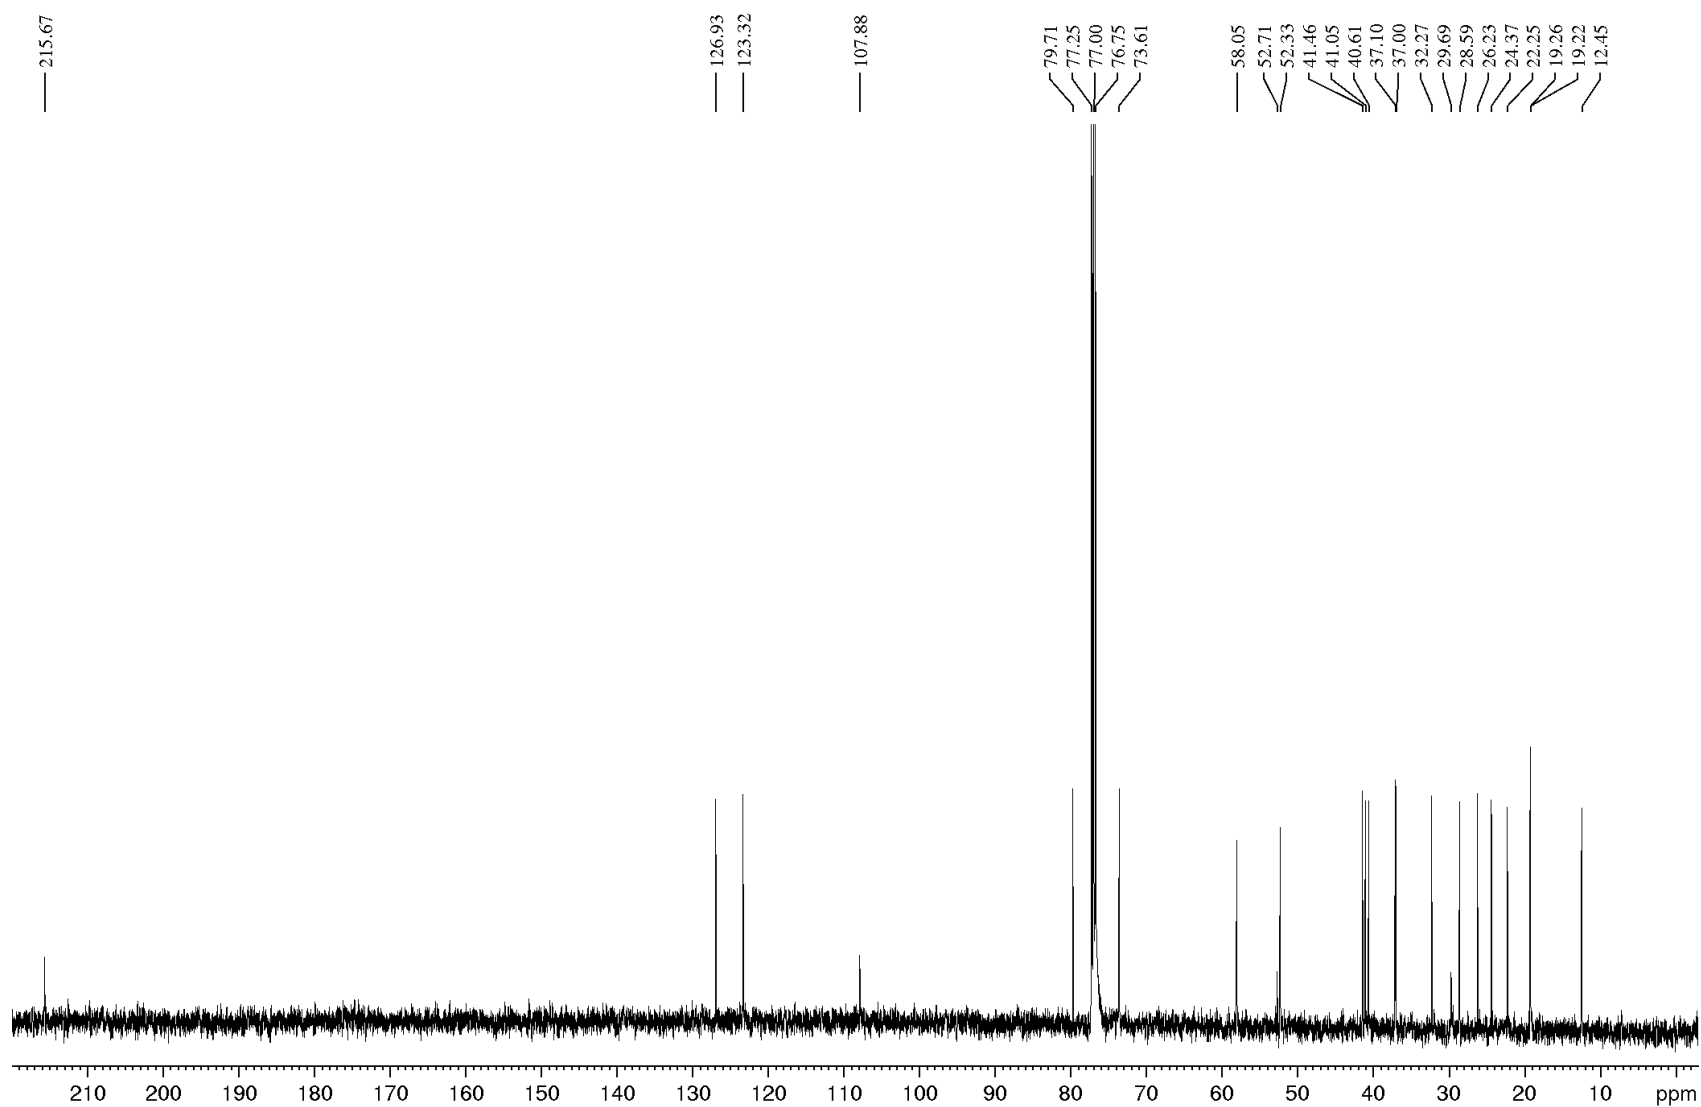

**Figure 2.** <sup>13</sup>C NMR (125 MHz) of trichoharzianol in CDCl<sub>3</sub>.
